# Supplementary material for: Weaving electron-rich alkynes: a durable in situ skin for stabilizing zinc anodes
Source: Royal Society of Chemistry journal article supplement (doi:10.1039/d4ee03164d), 2024-01-01
Supplement: d4ee03164d1.pdf [file d4ee03164d1.pdf]

## Electronic supplementary information (ESI)

### Weaving electron-rich Alkynes: a durable *in situ* skin for stabilizing zinc anodes

Xin Liu,<sup>‡<sup>abe</sup></sup> Weimian Zhang,<sup>‡<sup>b</sup></sup> Ying Liu,<sup>‡<sup>a</sup></sup> Xiaodong Li,<sup>a</sup> Deyi Zhang,<sup>ac</sup> Kun Wang,<sup>d</sup> Lifeng Liu,<sup>b</sup>  
Changshui Huang<sup>\*ace</sup>

<sup>a</sup> Beijing National Laboratory for Molecular Sciences, Organic Solids Laboratory, Institute of Chemistry, Chinese Academy of Science, Beijing 100190, China, E-mail: huangcs@iccas.ac.cn

<sup>b</sup> Songshan Lake Materials Laboratory (SLAB), Dongguan 523808, China

<sup>c</sup> University of Chinese Academy of Sciences, Beijing 100049, China

<sup>d</sup> Qingdao Xintaihe Nano Technology Co., Ltd, Qingdao 266600, China

<sup>e</sup> Qingdao Institute of Bioenergy and Bioprocess Technology, Chinese Academy of Sciences, Qingdao 266101, China

## 1. Preparation of e-TDYP@Zn.

Fig. S1 shows the schematical illustration of synthesis process of tetraethynylthiophene (TET) monomer and e-TDYP@Zn. 2g (5mmol) of 2, 3, 4, 5-tetrabromothiophene, 6.2 ml (45mmol) of  $(\text{CH}_3)_3\text{SiC}\equiv\text{CH}$ , 0.351 g (0.500 mmol) of  $\text{PdCl}_2(\text{PPh}_3)_2$ , 0.152 g (0.8 mmol) of  $\text{CuI}$ , and 0.2096 g (0.8 mmol) of were added into mixture of 80 mL TEA. The mixture was stirred under an argon atmosphere at 60 °C for 3 days in a tube sealing. The solvent was evaporated and the residue was then purified by column chromatography to yield tetra(trimethylsilyl)ethynylthiophene as pale-yellow powder (1.85 g). To a solution of 43.2 mg (0.1 mmol) tetra (trimethylsilyl)ethynylthiophene in 15 mL THF was added 0.4 mL TBAF (1M in THF, 0.4 mmol) and stirred at 0 °C for 30 min. The solution was then diluted with  $\text{CH}_2\text{Cl}_2$  and washed with distilled water and dried with anhydrous  $\text{Na}_2\text{SO}_4$ . The solvent was removed in vacuum rotary evaporation to yield TET.

The e-TDYP with assigned morphology on zinc substrate was synthesized using a modified Glaser–Hay coupling reaction. The zinc plates (2×5 cm, 10 pieces) and copper plate (4×12 cm, 10 pieces) were carried out an ultrasonic cleaning in 0.1 M hydrochloric acid for 30 seconds. The materials were then cleaned with deionized water, ethanol, and acetone solvent for 10 minutes each in the ultrasonic cleaner, and then dried in argon atmosphere. Prior to dripping 20 mL of pyridine containing 50 mg of TET monomer to the reaction unit, the folded copper-zinc envelopes were placed in a three-necked flask with 80mL mixed solvent of acetone, anhydrous pyridine, and TMEDA with volume ratio of 100:5:1 under argon atmosphere. The pyridine dripping process was proceeded at an even speed for 2 h by an argon-protected constant pressure funnel. After keeping the system at 50°C for 12 h, zinc plates were uncovered and washed with ethanol and acetone several times in turn and dried at 100 °C under vacuum to obtain the e-TDYP@Zn.

## 2. Material Characterizations

The morphology of e-TDYP@Zn was characterized by scanning electron microscopy (SEM, HITACHI S-4800) and transmission electron microscopy (TEM, JEM2100PLUS). The X-ray diffraction (XRD) of e-TDYP@Zn and Zn foil were obtained by diffractometer (Bruker D8 ADVANCE) under  $\text{Cu K}\alpha$  irradiation at  $\lambda = 1.5406 \text{ \AA}$ . The Raman spectra of e-TDYP@Zn and Zn

excited by the Ar laser of 532 nm were recorded at room temperature using a DRXXI system from Thermo Scientific. Fourier transform infrared spectrometer (FT-IR, Thermo Fisher Scientific Inc. Nicolet iN10) were employed to analyze the surface properties of the electrode. X-ray photoelectron spectroscopy (XPS, VG Scientific ESCA Lab220i-XL) was performed to detect the surface compositions of electrodes after soaking in 2 M ZnSO<sub>4</sub> with Al K $\alpha$  radiation as the excitation source. The obtained spectra were analyzed using XPS peak software.

The time-of-flight secondary-ion mass spectrometry (TOF-SIMS) measurements were performed using a PHI nano TOF II (ULVAC-PHI, Japan). A Bi<sup>3+</sup> liquid metal ion gun (LMIG) with an energy of 30 keV was used as the primary ion source to analyze a surface area of 80  $\mu\text{m} \times 80 \mu\text{m}$ . For depth profiling, an argon gas gun (Ar<sup>+</sup>) was employed as the sputter ion source, operating at 4 kV with a current of 200 nA, covering a sputter area of 400  $\mu\text{m} \times 400 \mu\text{m}$ . The relative sputtering rate was calibrated against SiO<sub>2</sub> and found to be approximately 0.83 nm/s under the given conditions. The e-TDYP sample was analyzed after 20 cycles of galvanostatic plating/stripping in symmetric cells at current density/areal capacity of 1 mA cm<sup>-2</sup>/1 mAh cm<sup>-2</sup>.

### **3. Electrochemical Measurements.**

The CR2032 coin cells were assembled in air and subjected to symmetric cell, asymmetric cell, and full cell tests. Electrodes of bare Zn, e-TDYP@Zn and copper foil were cut into circles with a diameter of 12 mm and a glass fiber filter with diameter of 16 mm was used as a separator (Whatman). The symmetrical cell is assembled from two identical zinc electrodes. The asymmetric cell was carried out using the copper foil as the working electrode and the zinc plate as the counter electrode. The full cell is coupled with MnO<sub>2</sub> and I<sub>2</sub> cathode. MnO<sub>2</sub> electrodes were prepared by applying a slurry to carbon paper (Toray Industries, Inc.) before drying in a vacuum oven at 60 °C for 12 h. The slurry consisted of lab-made MnO<sub>2</sub>, carbon nanotube and PVDF in a mass ratio of 7:2:1. The lab-made  $\alpha$ -MnO<sub>2</sub> nanorods were prepared by a hydrothermal method through potassium permanganate (KMnO<sub>4</sub>) following the reported procedure. The mass loading of MnO<sub>2</sub> was around 1-2 mg cm<sup>-2</sup> and the thickness of zinc foil is 50  $\mu\text{m}$  for regular tests. The mass loading of MnO<sub>2</sub> was around 8 mg cm<sup>-2</sup> and the thickness of Zn foil was 10  $\mu\text{m}$  for N/P = 2.7 tests. The mass loading of MnO<sub>2</sub> was around 8 mg cm<sup>-2</sup> and the thickness of Zn foil was 10  $\mu\text{m}$  for N/P = 2.7 tests. The thickness of zinc foil for

symmetrical cell performance test with high DOD is 20 or 30  $\mu\text{m}$ . The electrochemical measurements of half cells are performed in 2 M  $\text{ZnSO}_4$  solution.  $\text{Zn}||\text{MnO}_2$  full cell performance were performed for adding extra 0.2 M  $\text{MnSO}_4$  in 2 M  $\text{ZnSO}_4$ .

Cell performance tests were characterized by LAND electrochemical station for cycling stability. Other electrochemical performances such as Cyclic Voltammetry (CV), Electrochemical Impedance Spectroscopy (EIS), Tafel curves, chronoamperometry (CA) and LSV curves were measured by a CHI660E electrochemistry workstation. The Zn plating/stripping performance was measured in  $\text{Zn}||\text{Zn}$  symmetrical cells. The shelving-recovery tests of symmetrical cells of e-TDYP are operated at current density/areal capacity of  $5 \text{ mA cm}^{-2} / 5 \text{ mAh cm}^{-2}$ , subsequently applied with an alternating shelving period of 50 hours after  $25 \times N$  cycles ( $N = 1, 2, 3 \dots\dots$ ).

The exchange current density was calculated by linear fitting the relationship between the overpotential and current density based on Fig. 2b using the Butler-Volmer approximation equation to evaluate the kinetics of deposition:

$$i = i_0 \frac{F}{RT} \cdot \frac{\eta}{2}$$

where  $F$  is the Faraday's constant,  $R$  is the ideal gas constant,  $T$  is the Kelvin temperature, and  $\eta$  is the overpotential of reduction. The CE of Zn anodes was measured with  $\text{Zn}||\text{Cu}$  cells at a current density of  $2 \text{ mA cm}^{-2}$  and  $4 \text{ mA cm}^{-2}$ . The electrochemical performance of  $\text{Zn}||\text{MnO}_2$  full cell was tested in a voltage range of 0.8-1.8 V.

The electrochemical stability of the e-TDYP@Zn for anticorrosion is tested via a three-electrode system in 2 M  $\text{ZnSO}_4$  electrolyte for comparing with bare Zn. The electrochemical stability of the electrodes was evaluated using linear sweep voltammetry (LSV) at a scan rate of  $10 \text{ mV s}^{-1}$  with stainless steel (SS) electrodes. The electrochemical impedance spectroscopy (EIS) of the full cells in the frequency range of 0.01-100 kHz and CV curves at a scan rate of  $0.5 \text{ mV s}^{-1}$ . The amount of electrolyte for single coin cell was  $\approx 100 \mu\text{L}$ . The DEMS test was carried out by measuring the

hydrogen evolution of symmetric cell at 0.05 mA / 0.5 mAh using a commercial system (Hiden HPR-40) with an ECC-DEMS cell.

#### 4. Finite element analysis.

Finite element analysis (FEA) was employed in this study to simulate the behavior of the e-TDYP@Zn anode interface under electrochemical cycling. COMSOL Multiphysics was used to construct a 2D model of the electrolyte and electrode interface environment with a size of 3×6 μm. Semicircles were utilized to represent the surface protuberances on the Zn electrode, while the in situ synthesized e-TDYP was modeled by a space with a width of 200 nm between two rectangles with a size of 0.02×1 μm. Porous electrodes were used to describe the three-dimensional structure e-TDYP with permeability to electrolyte and electrical conductivity through its domains. The simulation uses continuity equation to calculate the material balance in the electrolyte, and Nernst-Planck equation to the flux. Electrode reaction kinetics are given by the Butler-Volmer equation. The model of e-TDYP is built as multiple uniformly distributed porous regions with negative charges grown on the anode due to its electronegative nature. The simulated model does not consider possible side reactions. The vertical walls and the bottom edges of the GDY are assumed to be insulation boundaries. Post-processing is conducted to investigate the distribution of current density and Zn<sup>2+</sup> ionic concentration.

#### 5. Theoretical Calculations.

Density functional theory (DFT) calculations were carried out using Gaussian 16 packages. Models for all computational molecules were optimized by B3LYP functional with a 6-31+G (d,p) basis set and D3 dispersion correction. Frequency calculations using M06-2x functional were performed to determine the nature of a stationary point as the true local minimum. The electrostatic potential (ESP) mapping was postprocessed with Multiwfn 3.9 and Visual Molecule Dynamics (VMD).

The adsorption energies  $E_{\text{ads}}$  were defined as:

$$E_{\text{ads}} = E_{\text{total}} - E_{\text{sub}} - E_{\text{Zn}^{2+}}$$

where  $E_{\text{total}}$  is the total energy of the system,  $E_{\text{sub}}$  is the energy of the e-TDYP model,  $E_{\text{Zn}^{2+}}$  is the energy of Zn<sup>2+</sup>.

The desolvation energy  $E_{de}$  was calculated by the following equation:

$$E_{de} = E_{Zn(H_2O)_6^{2+}} - E_{Zn(H_2O)_5^{2+}} - E_{H_2O}$$

where  $E_{Zn(H_2O)_6^{2+}}$ ,  $E_{Zn(H_2O)_5^{2+}}$ , and  $E_{H_2O}$  are the energy of  $Zn(H_2O)_6^{2+}$ ,  $Zn(H_2O)_5^{2+}$  and  $H_2O$  respectively.

The adsorption energy of H atom  $E_{ads(H)}$  was calculated by the following equation:

$$E_{ads(H)} = E_{H@cat} - E_{cat} - E_H$$

where the  $E_{H@cat}$  is the total energies of catalyst surface with adsorbed H species,  $E_{cat}$  represents the energy of catalyst surface,  $E_H$  is one-half the energy of gas-phase  $H_2$ .

The hydrogen adsorption free energy is derived from

$$\Delta_G = E_{ads(H)} + \Delta E_{ZPE} - T\Delta S$$

where  $\Delta E_{ZPE}$  and  $\Delta S$  are the changes in zero-point energy and entropy, respectively.

At  $T=298.15$  K,  $\Delta G$  can be obtained by  $\Delta G = E_{ads(H)} + 0.24$  eV.

## 6. Figures S1-S20

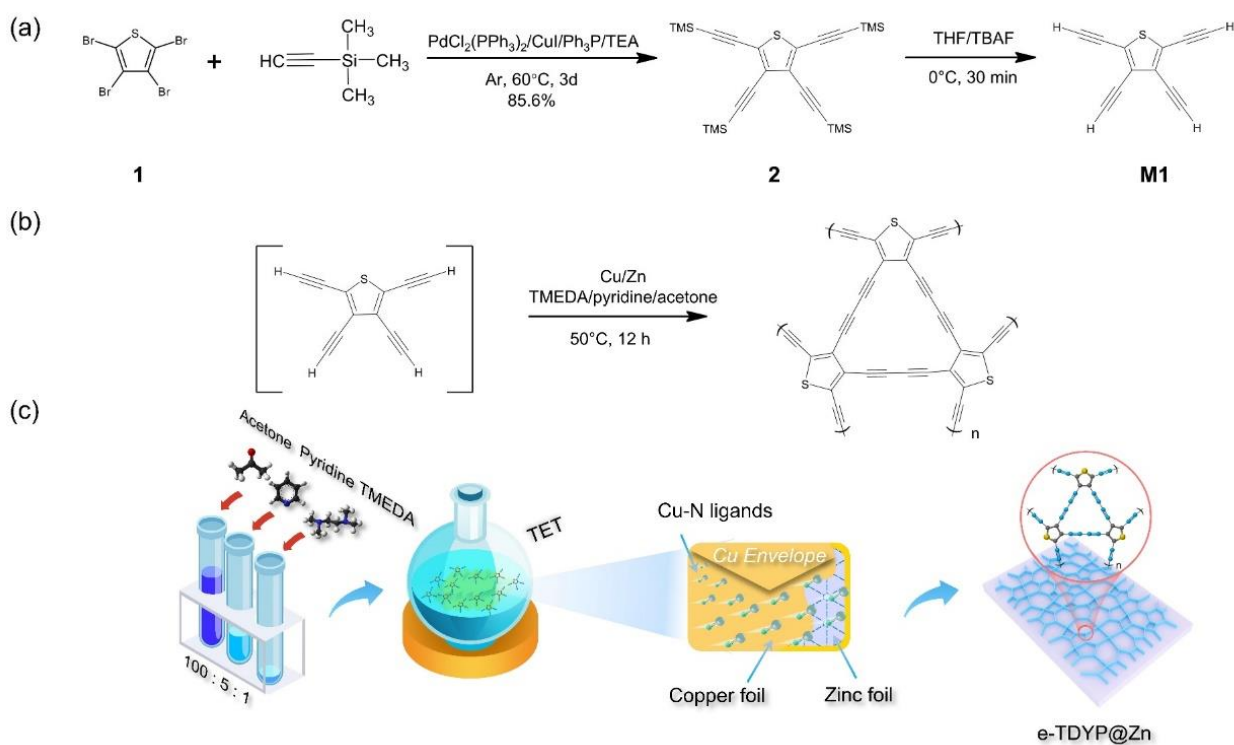

**Fig. S1** (a) Synthesis of 2,3,4,5-tetrakis[(trimethylsilyl)ethynyl]-thiophene (2) and 2,3,4,5-tetraethynylthiophene (M1). (b) Synthesis of thiophdiyne. (c) Schematical illustration of formation mechanism of e-TDYP@Zn.

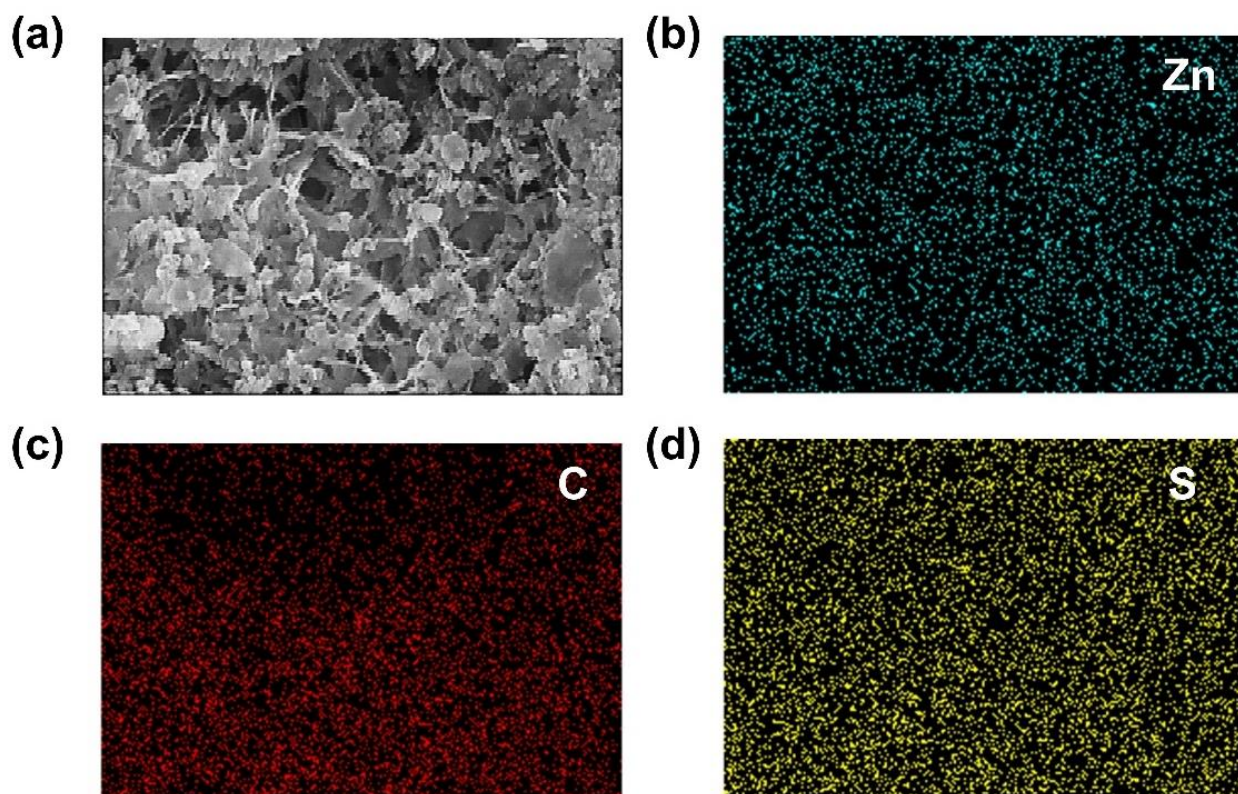

**Fig. S2** (a) Top-view SEM image of e-TDYP@Zn and (b-d) the corresponding elemental dispersive X-ray spectroscopy (EDS) mappings.



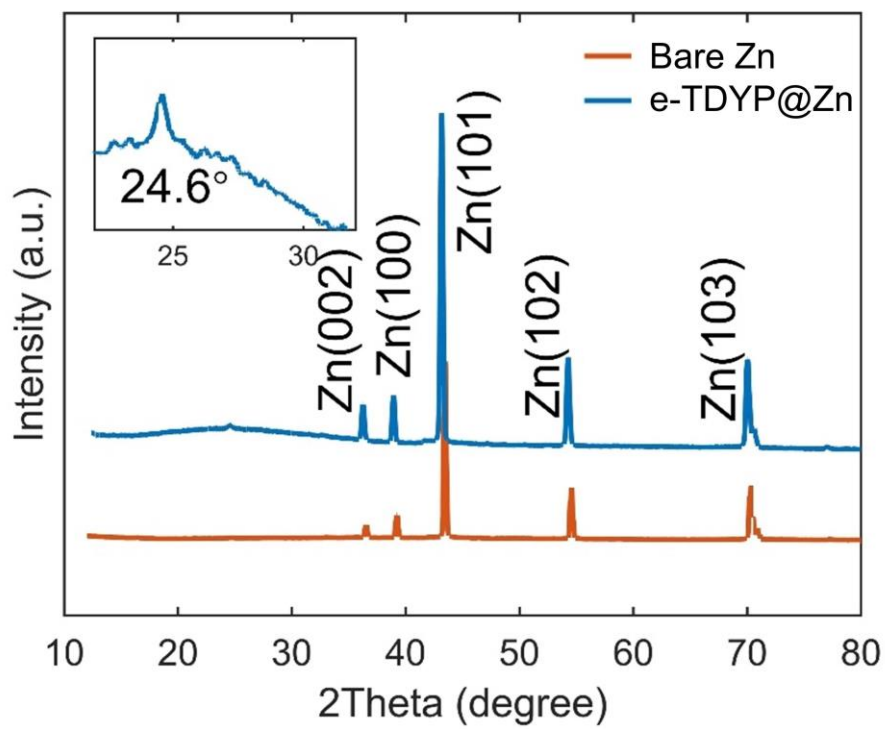

**Fig. S3** Comparison of the XRD patterns of e-TDYP@Zn and bare Zn.

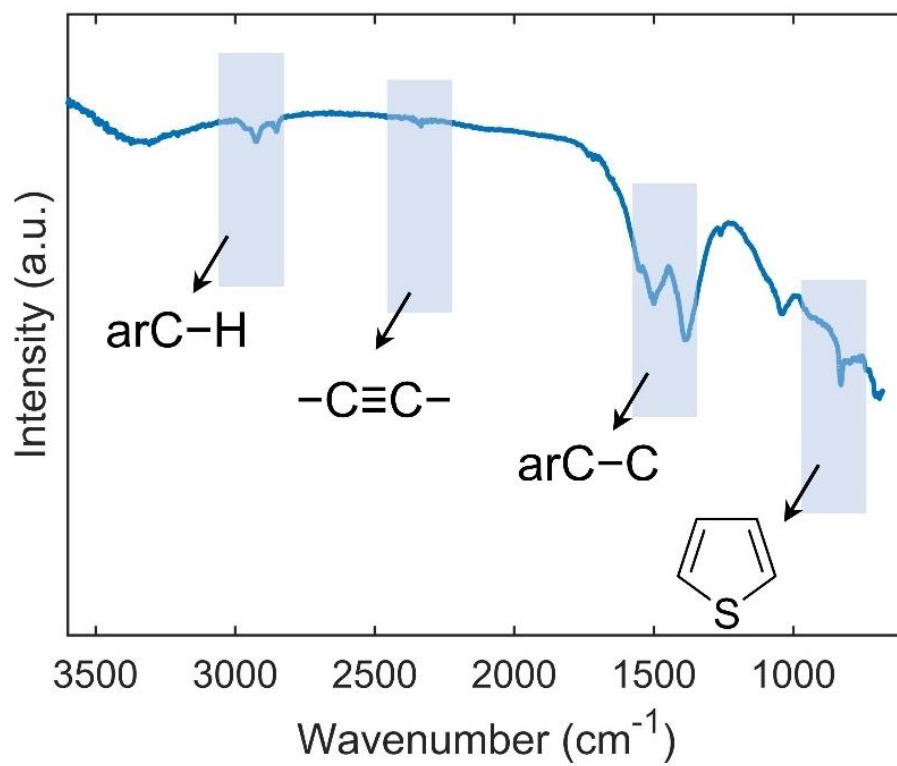

**Fig. S4** FTIR spectra of the e-TDYP@Zn

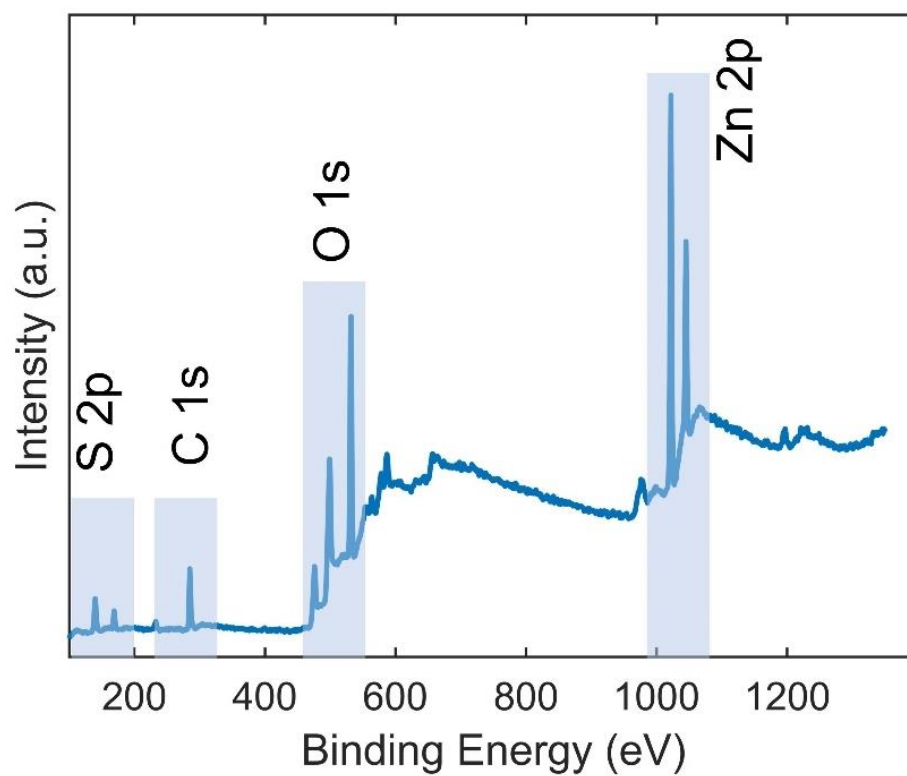

**Fig. S5** Full XPS spectrum of e-TDYP@Zn.

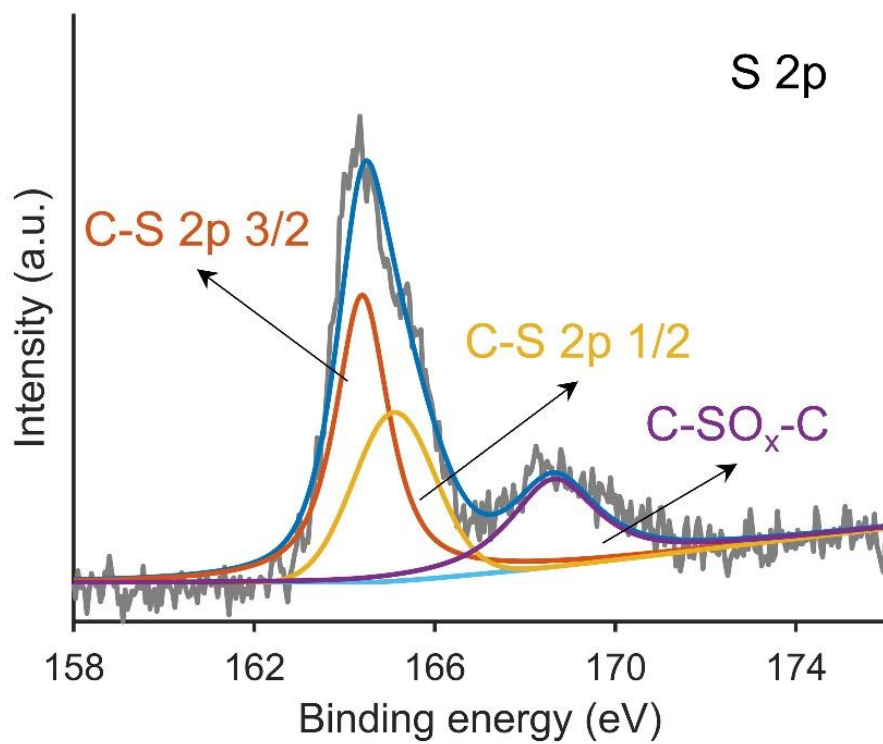

**Fig. S6** S 2p XPS spectra of e-TDYP@Zn.

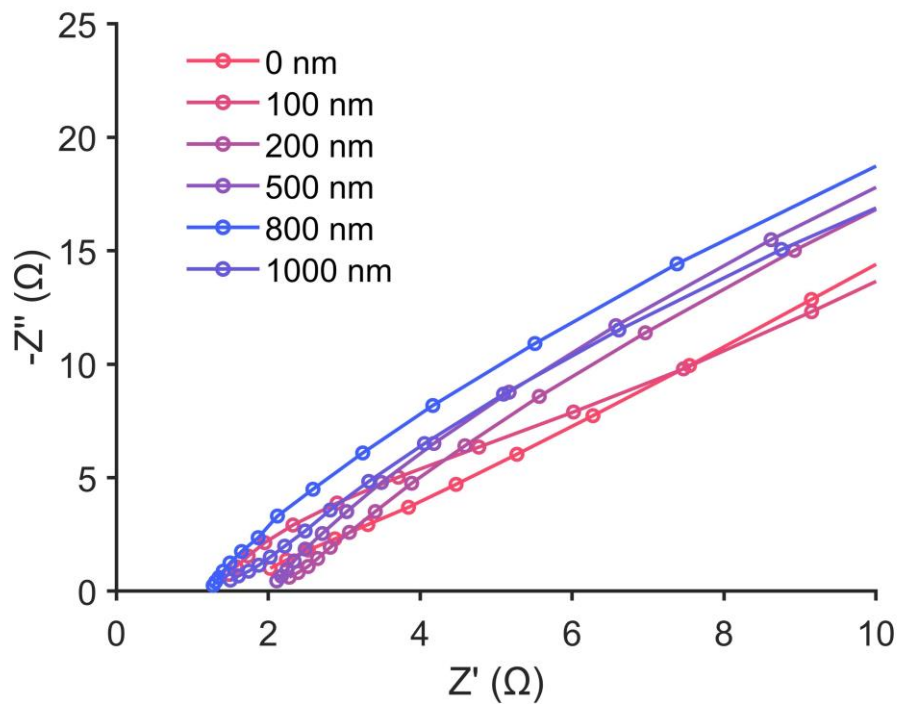

**Fig. S7** The Nyquist plots for symmetric cells with different thickness of e-TDYP.

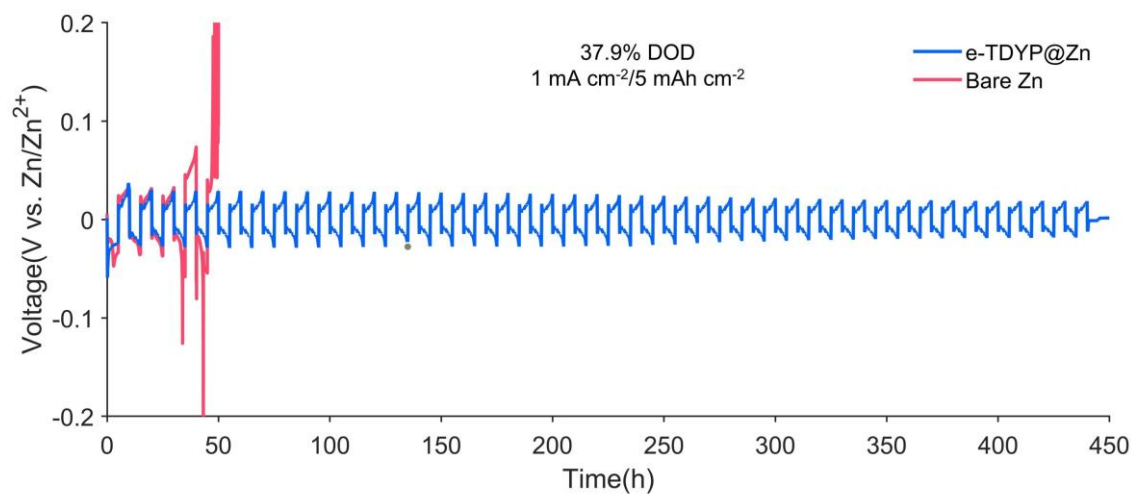

**Fig. S8** Voltage profiles of symmetric cells with e-TDYP@Zn and bare Zn anodes at current density/areal capacity of  $1 \text{ mA cm}^{-2}/5 \text{ mAh cm}^{-2}$ .

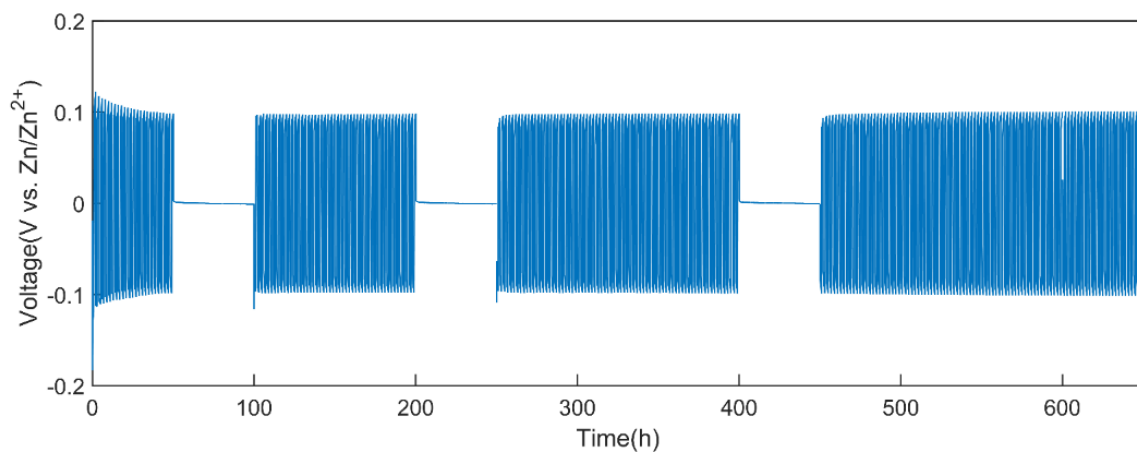

**Fig. S9** The shelve-recovery performances for e-TDYP@Zn under  $5 \text{ mA cm}^{-2}$  and  $5 \text{ mA h cm}^{-2}$ .

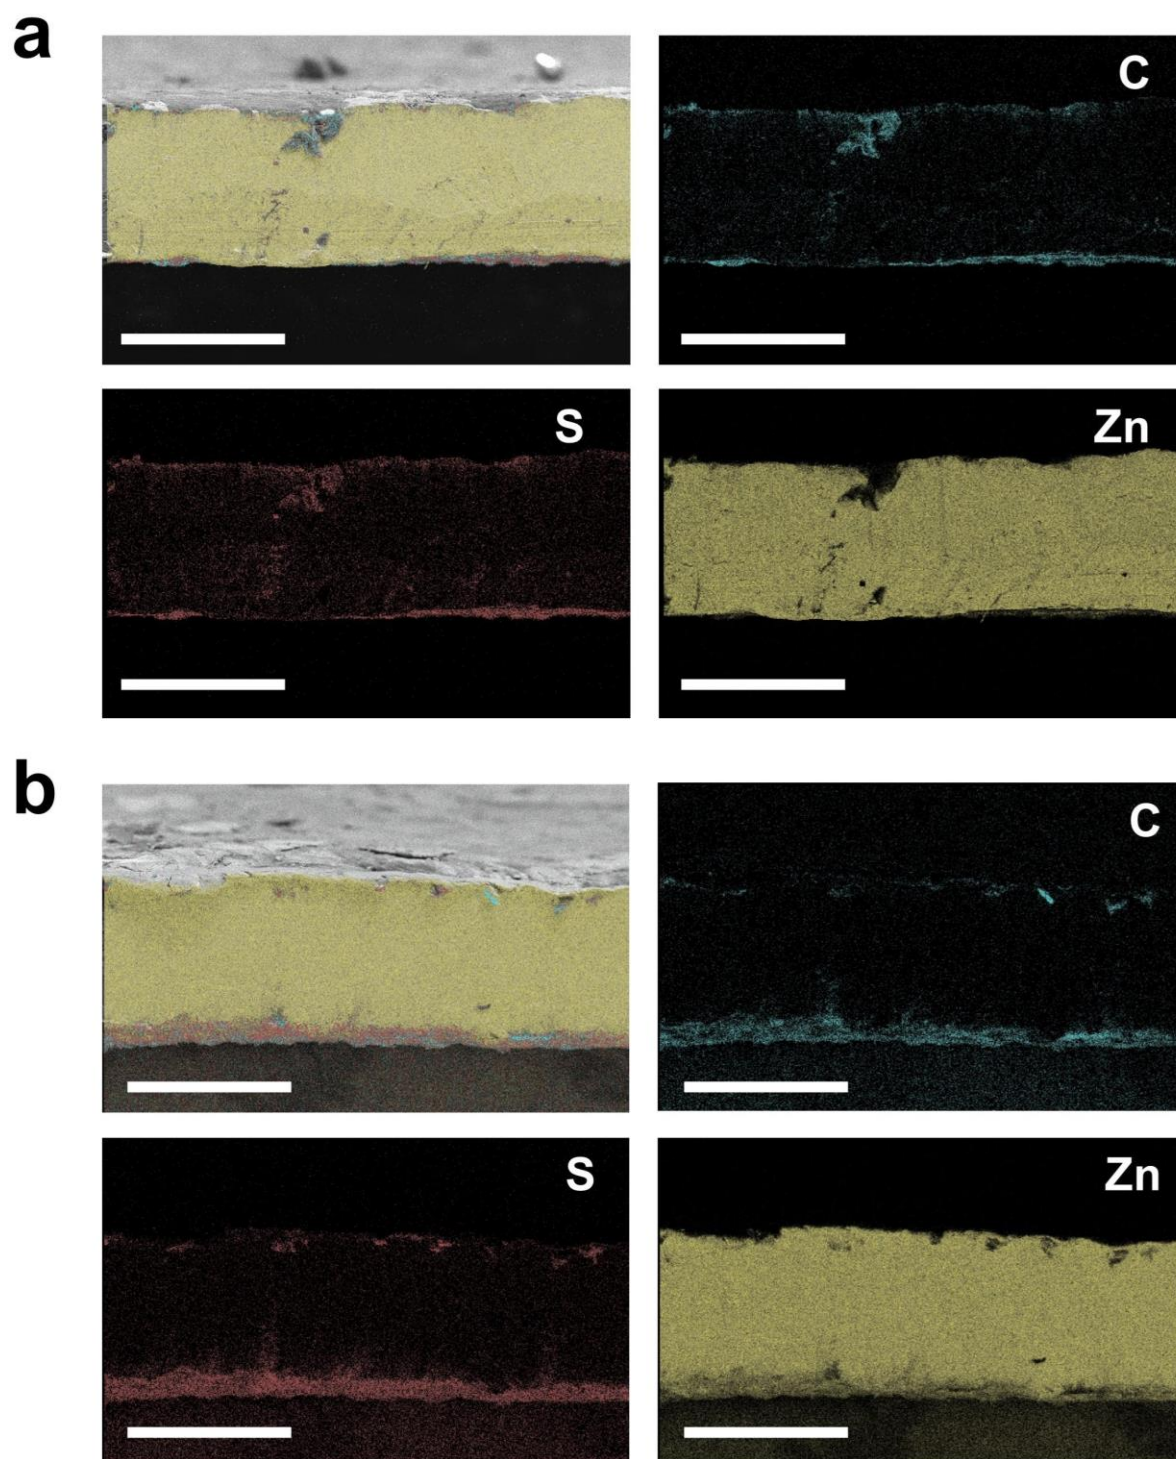

**Fig. S10** Cross-sectional SEM images of e-TDYP@Zn: (a) before and (b) after deposition at a current density of 1 mA cm<sup>-2</sup> for 1 hour. The scale bars for SEM images are all equivalent to 100 μm.



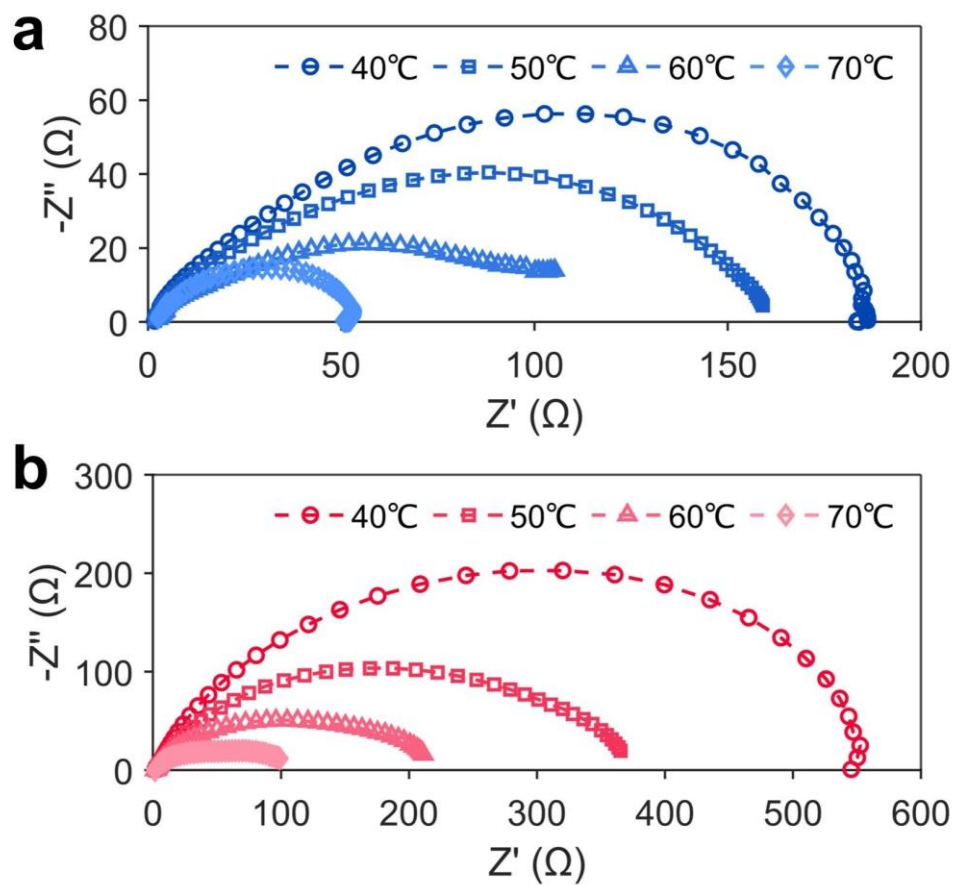

**Fig. S11** The EIS plots of (a) e-TDYP@Zn electrode and (b) bare Zn electrode at different temperatures.

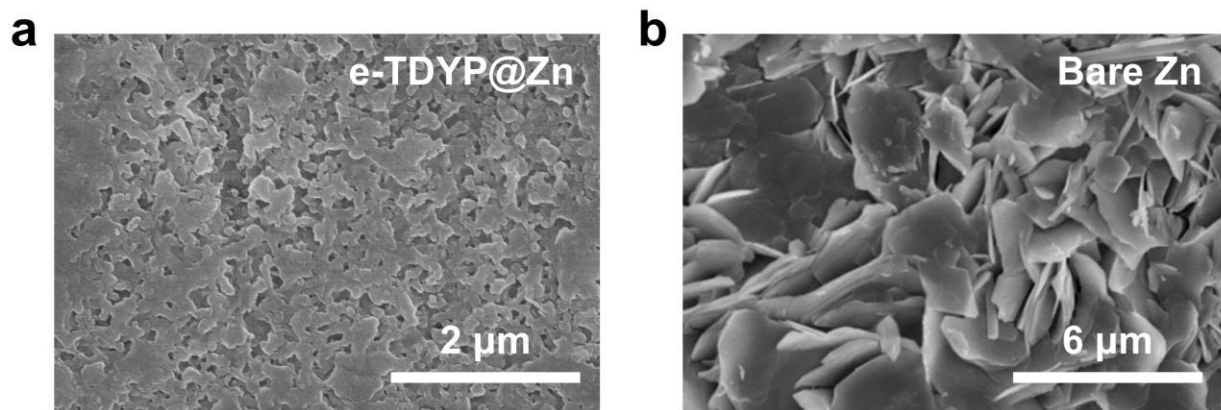

**Fig. S12** SEM images of (a) e-TDYP@Zn and (b) bare Zn anodes after cycling.

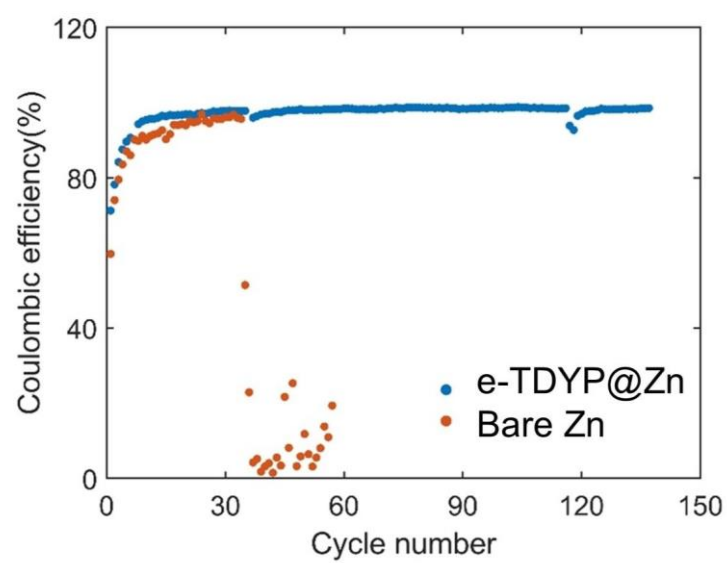

**Fig. S13** Coulombic efficiency of Zn plating/stripping  $1 \text{ mAh cm}^{-2}$  at current densities of  $2 \text{ mA cm}^{-2}$ .

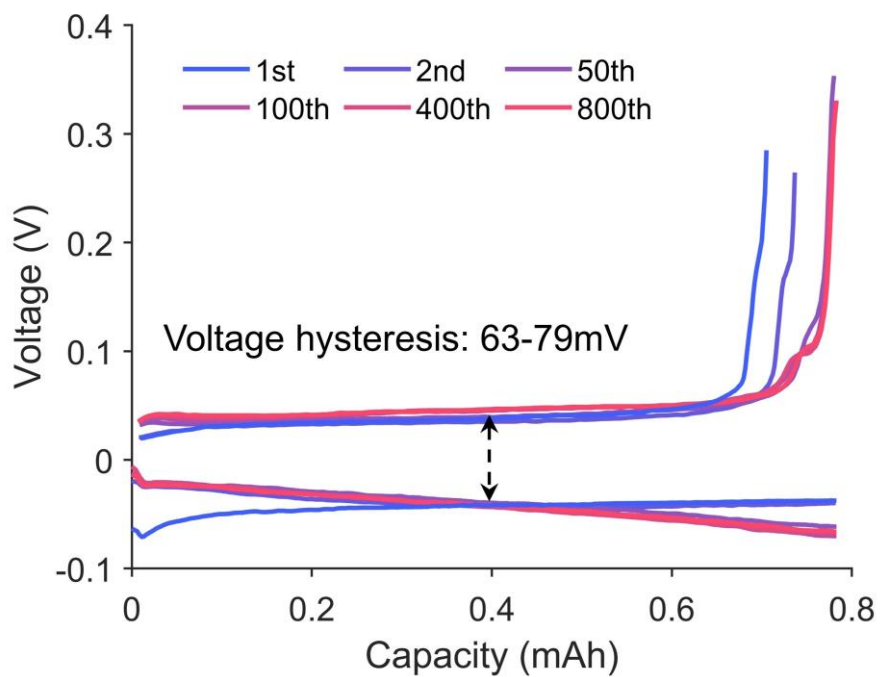

**Fig. S14** Voltage hysteresis of e-TDYP@Zn anode at 4 mA cm<sup>-2</sup> for 1 mAh cm<sup>-2</sup>.

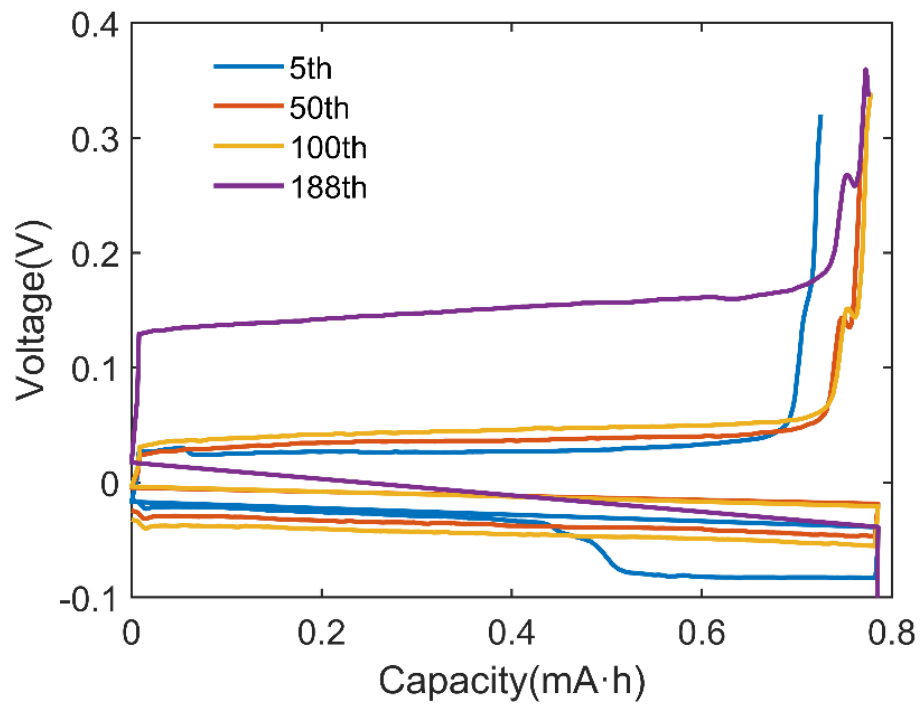

**Fig. S15** Voltage profiles of Cu||bare Zn at 4 mA cm<sup>-2</sup> for 1 mAh cm<sup>-2</sup>.

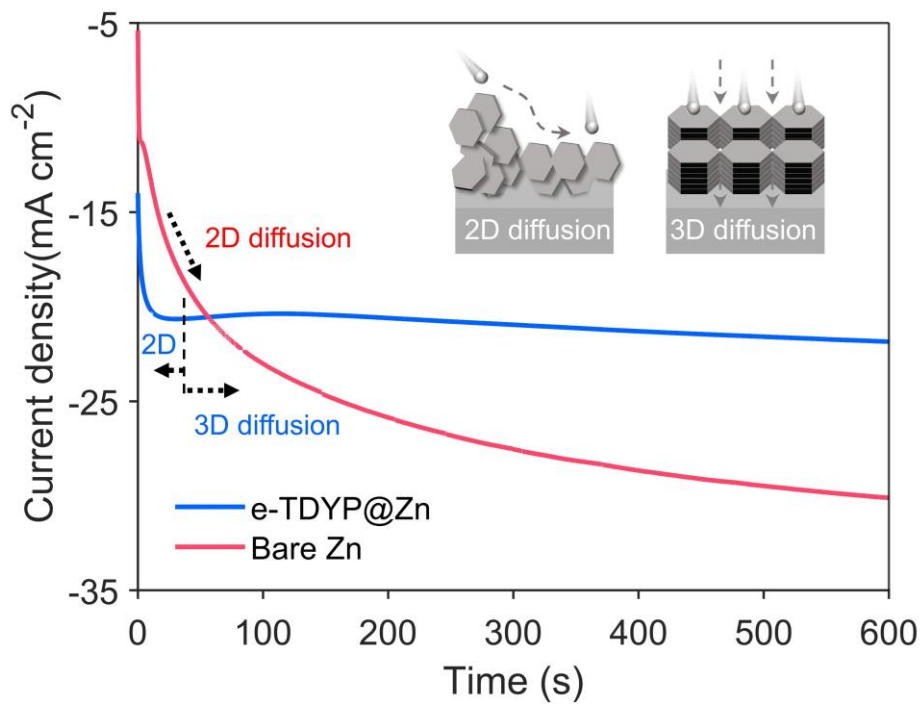

**Fig. S16** Chronoamperometry (CA) test of e-TDYP@Zn and bare Zn electrodes.

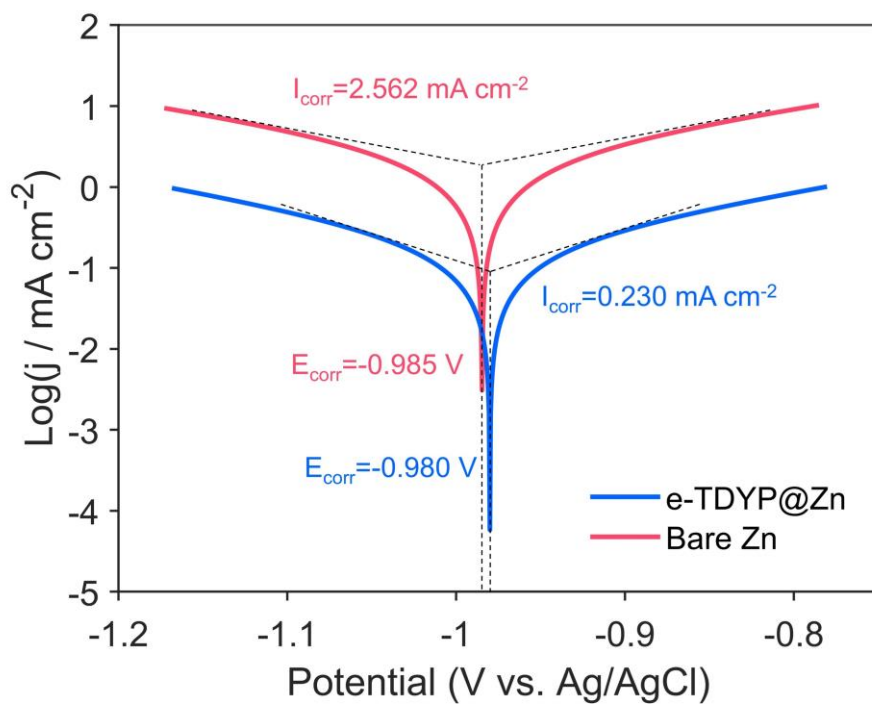

**Fig. S17** Tafel curves and corresponding corrosion potential and current density.

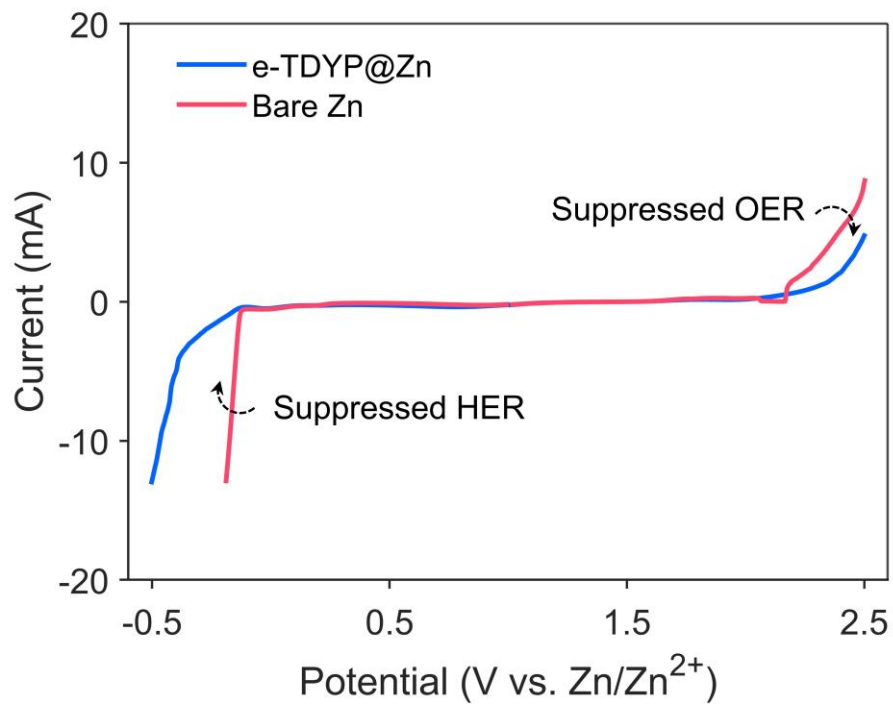

**Fig. S18** LSV curves of e-TDYP@Zn and bare Zn at  $1 \text{ mV s}^{-1}$ .



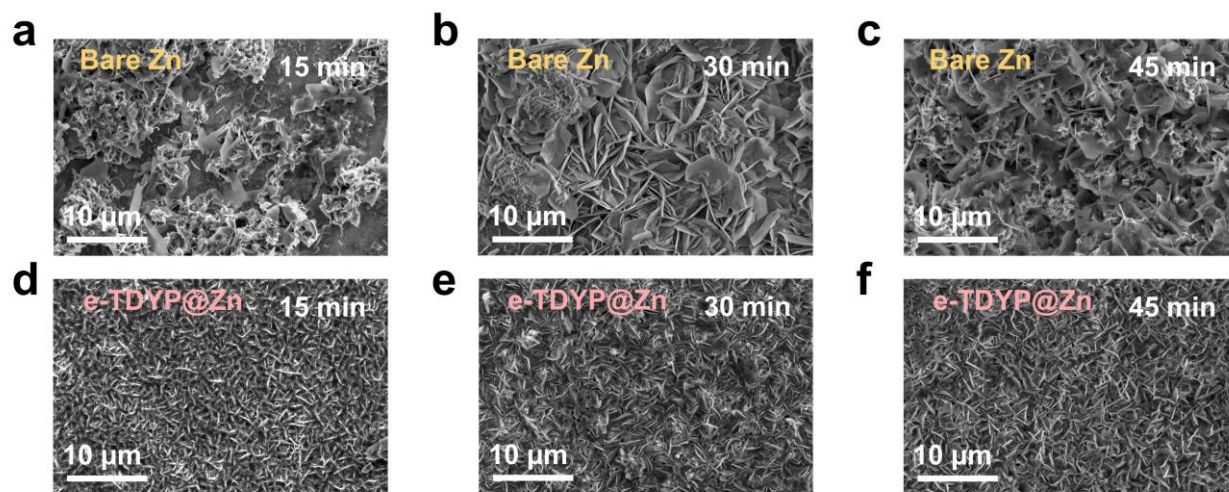

**Fig. S19** SEM images of (a-c) bare Zn and (d-f) e-TDYP@Zn at different deposition time.

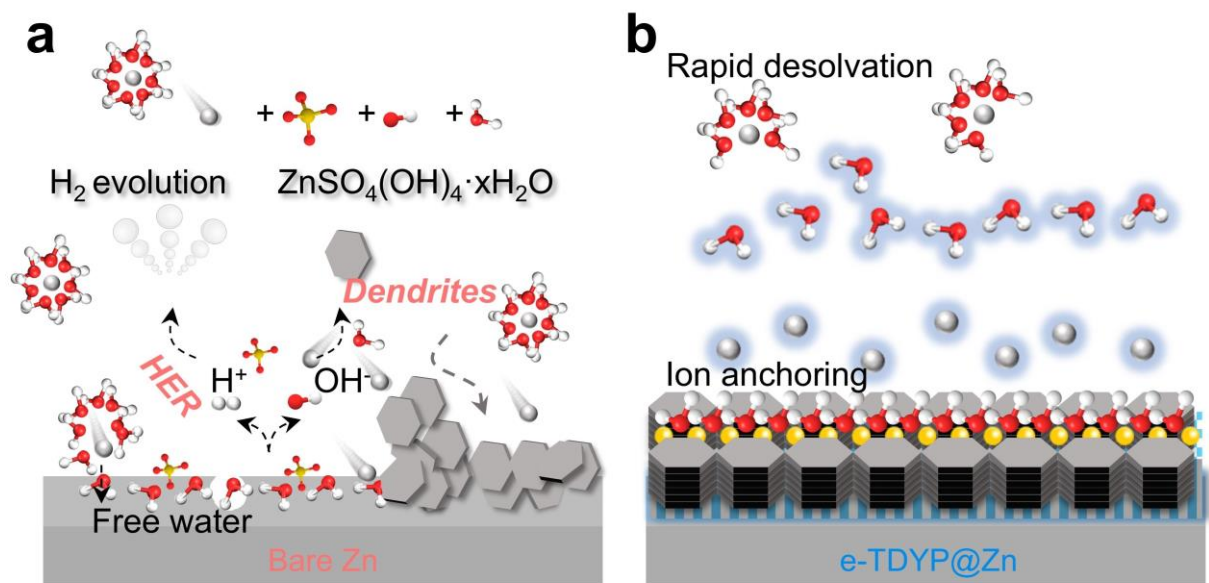

**Fig. S20** Schematic illustration of the corrosion behavior of (a) bare Zn and (b) e-TDYP@Zn.

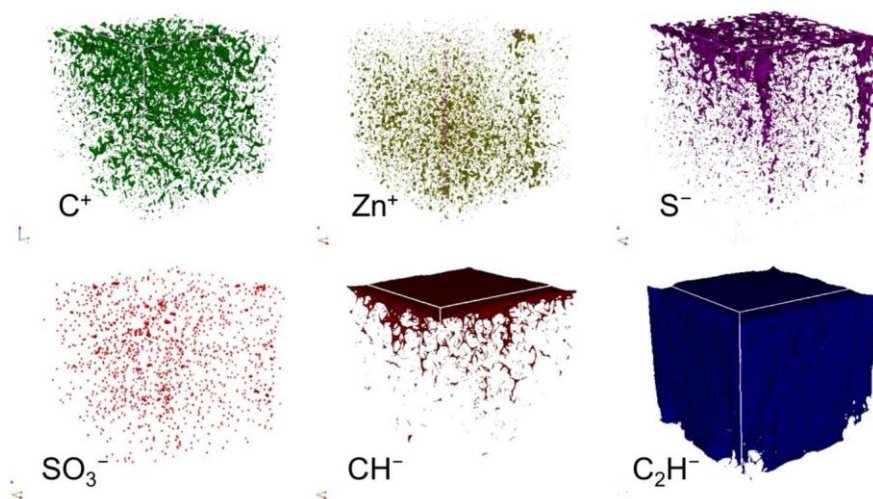

**Fig. S21** Three-dimensional view of  $C^+$ ,  $Zn^+$ ,  $S^-$ ,  $SO_3^-$ ,  $CH^-$  and  $C_2H^-$  fragments distributions of e-TDYP@Zn in the TOF-SIMS sputtered volumes.

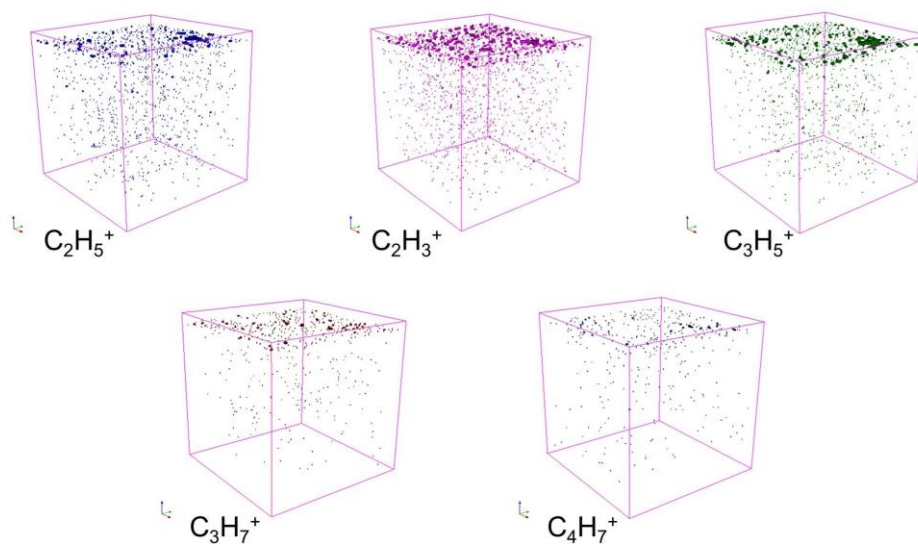

**Fig. S22** Three-dimensional view of  $C_2H_5^+$ ,  $C_2H_3^+$ ,  $C_3H_5^+$ ,  $C_3H_7^+$ , and  $C_4H_7^+$  fragments distributions of e-TDYP@Zn in the TOF-SIMS sputtered volumes.

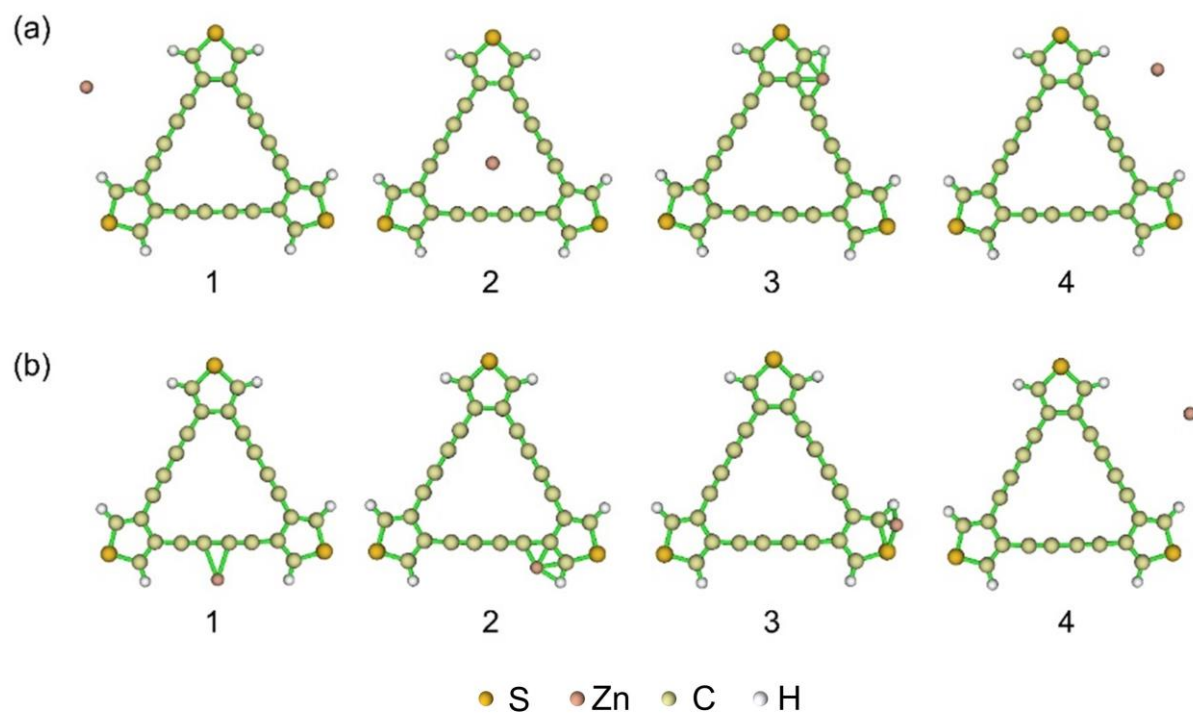

**Fig. S23** Optimized structures of diffusion pathway of  $\text{Zn}^{2+}$  in the e-TDYP.

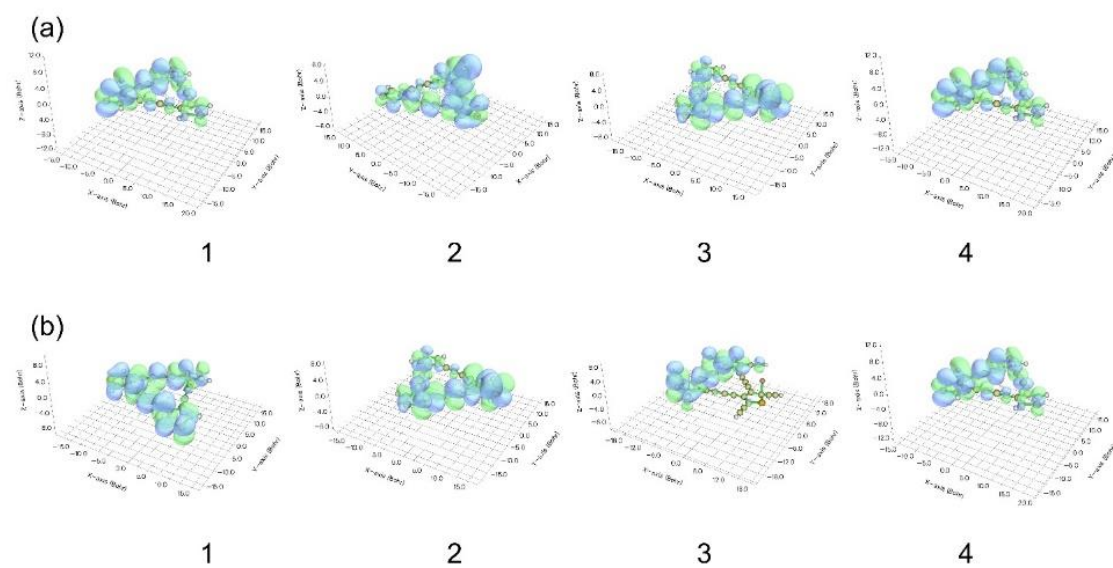

**Fig. S24** Electron density distributions of  $Zn^{2+}$  in the e-TDYP.

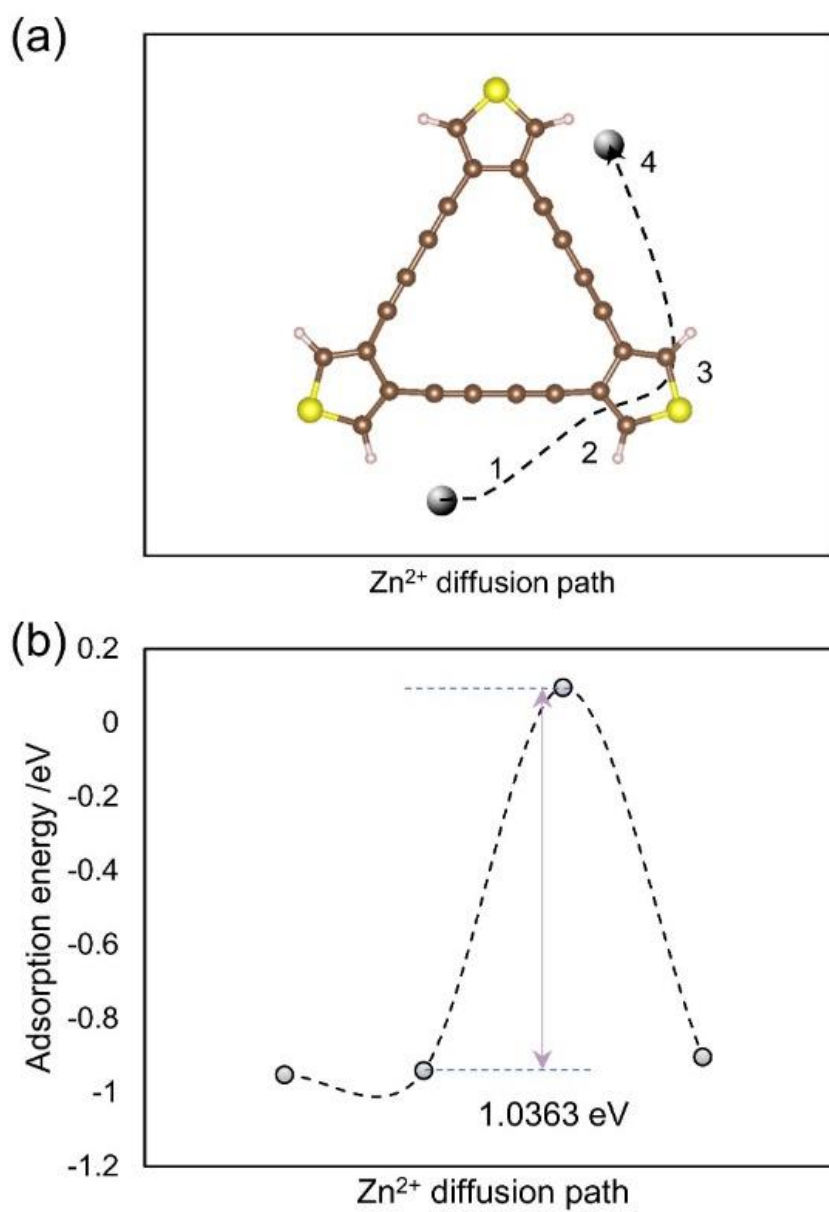

**Fig. S25** (a) First-principles calculations of Zn<sup>2+</sup> diffusion pathway in the e-TDYP bypassing the anchoring site of the cyclic diyne center and (b) the corresponding migration energy barrier.

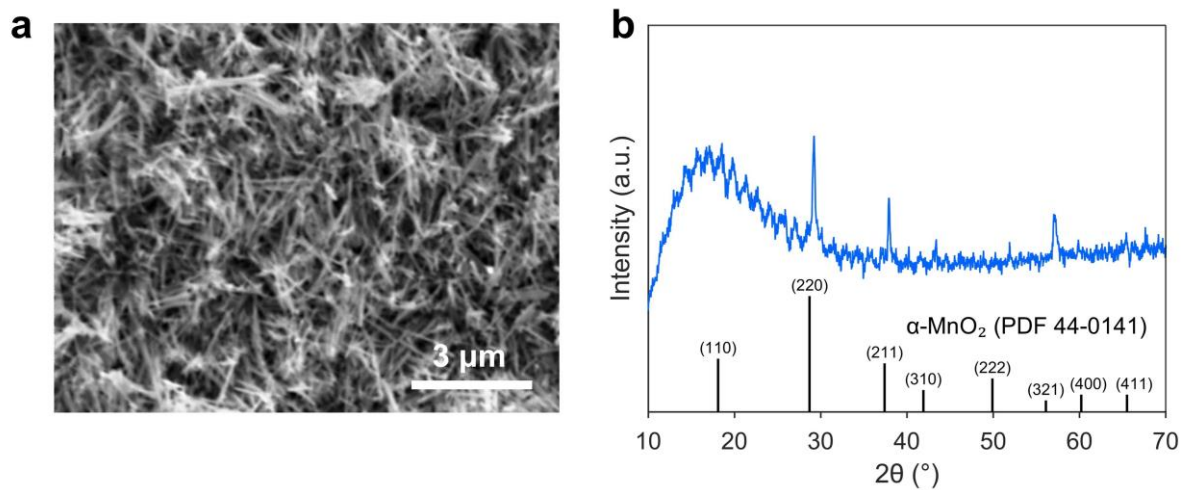

**Fig. S26** (a) SEM image and (b) XRD pattern of the synthesized  $\alpha\text{-MnO}_2$ .



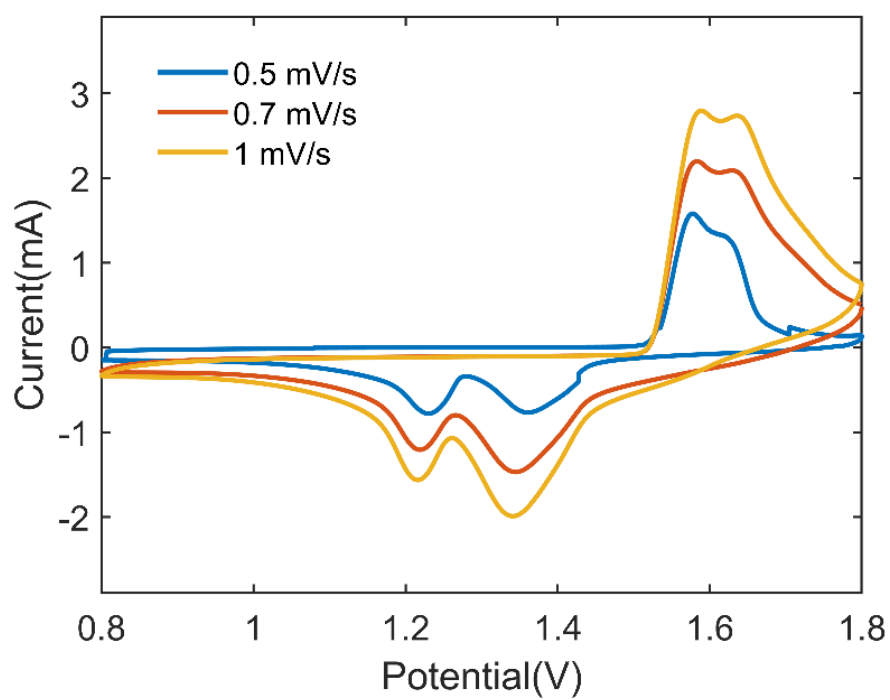

**Fig. S27** CV curve of e-TDYP@Zn||MnO<sub>2</sub> full cell under various scan rate.

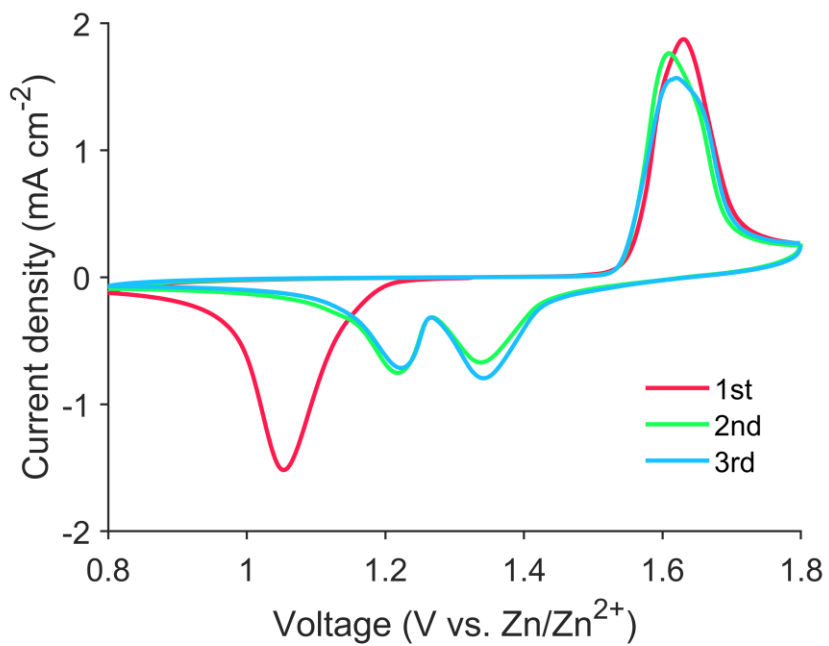

**Fig. S28** CV curves recorded at the scan rate of 0.5 mV s<sup>-1</sup> of bare Zn full cells.

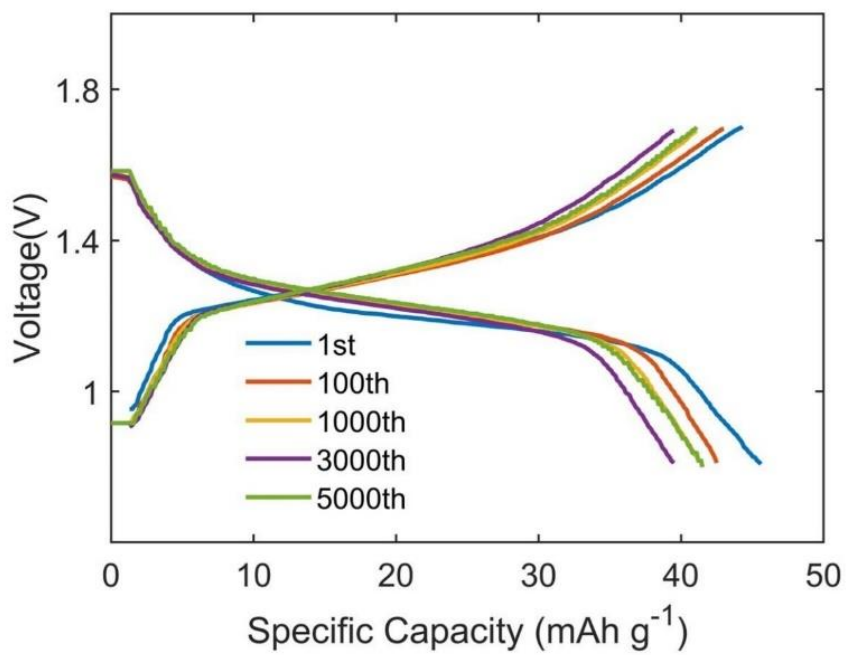

**Fig. S29** Charge and discharge voltage profiles of e-TDYP@Zn||I<sub>2</sub> full cell at 1 A g<sup>-1</sup>.

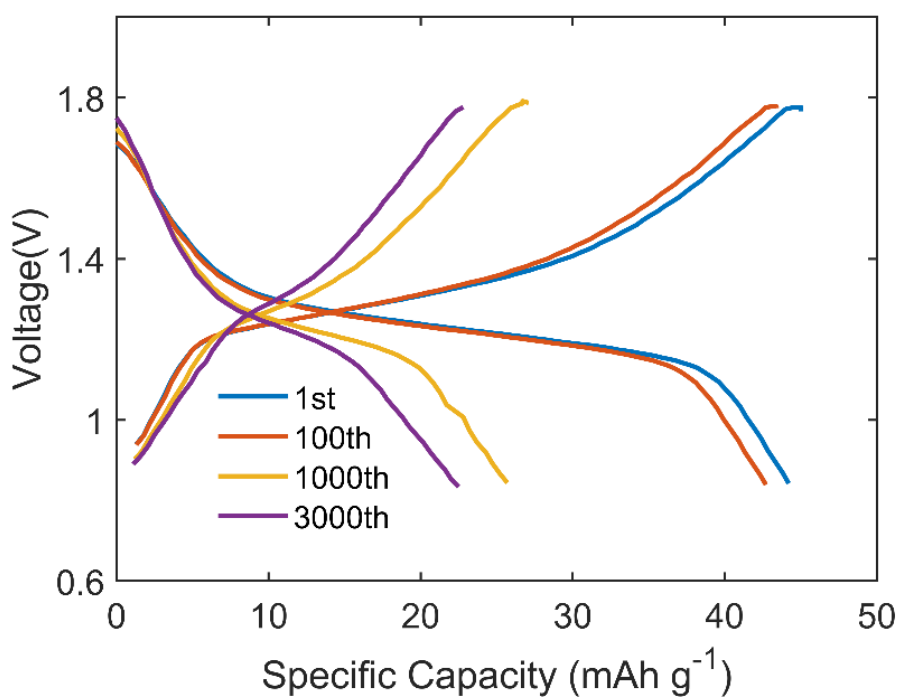

**Fig. 30** Charge and discharge voltage profiles of Bare Zn||I<sub>2</sub> full cell at 1 A g<sup>-1</sup>.

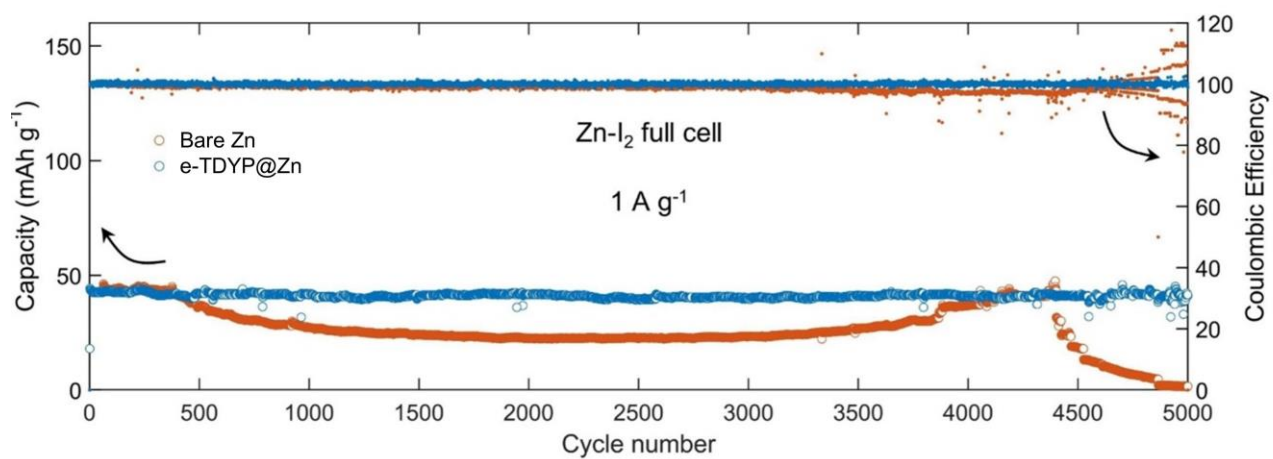

**Fig. S31** Cycling performance of Zn||I<sub>2</sub> full cells at a current density of 1 A g<sup>-1</sup>.

**Tab. S1** | Long-term cycling performance comparison of e-TDYP@Zn symmetric cells with recent reports.

| Symmetric cell           | Current density (mA cm <sup>-2</sup> ) | Areal capacity (mAh cm <sup>-2</sup> ) | Lifespan (h) | Reference                                                    |
|--------------------------|----------------------------------------|----------------------------------------|--------------|--------------------------------------------------------------|
| e-TDYP@Zn                | 5                                      | 5                                      | 1200         | This work                                                    |
|                          | 10                                     | 10                                     | 250          |                                                              |
| (CS/SA) <sub>4</sub> -Zn | 5                                      | 2.5                                    | 1750         | <i>Adv. Mater.</i> 2024, <b>36</b> , 2306734                 |
|                          | 10                                     | 10                                     | 210          |                                                              |
| IM (002)Zn               | 5                                      | 5                                      | 1050         | <i>Adv. Mater.</i> 2024, 2411004                             |
|                          | 10                                     | 10                                     | 870          |                                                              |
| ZSO/DN-0.09              | 5                                      | 5                                      | 550          | <i>Angew. Chem. Int. Ed.</i> , 2024, <b>136</b> , e202403050 |
|                          | 8                                      | 8                                      | 130          |                                                              |
| CIL@Zn                   | 5                                      | 2                                      | 700          | <i>Adv. Funct. Mater.</i> 2024, <b>34</b> , 2312855          |
|                          | 10                                     | 4                                      | 200          |                                                              |
| Fs-Zn                    | 10                                     | 1                                      | 1720         | <i>Angew. Chem. Int. Ed.</i> , 2024, <b>136</b> , e202406292 |
|                          | 10                                     | 5                                      | 330          |                                                              |
| P2VP-Zn                  | 5                                      | 5                                      | 300          | <i>Adv. Mater.</i> 2024, <b>36</b> , 2307727                 |
| Sn-Mxene-Zn              | 5                                      | 5                                      | 920          | <i>Adv. Energy Mater.</i> 2024, <b>14</b> , 2400613          |
| (002) etched-Zn          | 1                                      | 1                                      | 1650         | <i>Energy Environ. Sci.</i> , 2024, <b>17</b> , 642-654      |
|                          | 10                                     | 5                                      | 500          |                                                              |
